# Supplementary material for: Lack of recognition of genetic biodiversity: International policy and its implementation in Baltic Sea marine protected areas
Source: Springer Nature journal article supplement (doi:10.1007/s13280-016-0776-7), 2016-04-20
Supplement: MOESM1 [file 15654548]

***Ambio***

Electronic Supplementary Material

*This supplementary material has not been peer reviewed.*

**Title: Lack of recognition of genetic biodiversity: international policy and its implementation in Baltic Sea marine protected areas**

Authors: Linda Laikre, Carina Lundmark, Eeva Jansson, Lovisa Wennerström, Mari Edman, Annica Sandström

## Appendix S1: Baltic Sea Marine Protected Areas (MPAs) and our rationale for focusing on HELCOM MPAs

There are several types of MPAs in the Baltic Sea including variation among countries, legal status, etc. We initially intended to focus on two different types – Natura 2000 and HELCOM MPAs. Natura 2000 is a network of nature protection areas established under the EU Habitats Directive and/or the EU Birds Directive. Natura 2000 areas occur both on land and in water including in the Baltic Sea. Their governance are outlined and monitored by the EU Commission.

HELCOM MPAs (until recently called BSPAs, Baltic Sea Protected Areas) are coastal and marine protected areas in the Baltic Sea established under the Helsinki Commission ([www.helcom.fi](http://www.helcom.fi)). They represent regional implementation of the Helsinki Convention. HELCOM MPAs are established based on HELCOM Recommendation 15/5 which was renewed in 2014 and is now superseded by the HELCOM Recommendation 35/1 (See Table 1).

Our rationale for choosing these two types of MPAs (Natura 2000 and HELCOM MPAs) were that *i*) they represent types of marine protected areas that occur in all four countries that we chose to study, and *ii*) they represent different degree of legal commitment. The Natura 2000 network of conservation areas is linked to the implementation of the Habitat Directive (92/43/EEC) and the Birds Directive (2009/147/EEC) that are binding for all EU member states (including our four focal countries; Moussis 2015), whereas the HELCOM MPA system represents a non-binding agreement.

We identified HELCOM MPAs of the four separate focal countries from [www.helcom.fi](http://www.helcom.fi), and Natura 2000 that included at least some marine habitat using the Natura 2000 Network viewer (<http://natura2000.eea.europa.eu/#>), the Swedish Environmental Protection Agency's map function (<http://skyddadnatur.naturvardsverket.se/>). We also contacted responsible authorities in the four countries to obtain lists of Natura 2000 with marine habitat in the Baltic Sea. To obtain management plans for the MPAs we searched the above sites, performed regular searches on the Internet, and contacted a range of authorities and contact persons of the separate countries.

During this work we became aware that *i*) HELCOM MPAs and Natura 2000 are, in most cases overlapping, *ii*) such overlap occur in all four countries that we investigated, although the degree of overlap varies both among and within countries, *iii*) specific management plans for HELCOM MPAs that are separate from the Natura 2000 plans rarely exist in any of the investigated countries, and *iv*) in all four countries the HELCOM MPAs and the Natura 2000 often overlap with other national forms of area protection. Further, we found that there are several hundred Natura 2000 sites in the Baltic Sea and that the management plans for them are not easily accessible in all countries. Also, it is not always straightforward to find out which areas include marine habitat and which areas only concern values on land. Thus, we chose to focus on HELCOM MPAs of the four countries and collected all available management plans that we were able to locate for protected areas within these MPAs.

### *Management complexity*

There are a total of 64 HELCOM MPAs in the Baltic Sea countries we investigated; 20 Swedish ones, 33 Finnish, 7 Estonian, and 4 German (Fig. 3, Tables 3; S3). Finding management plans was not straightforward in any of the countries. We had to use Internet

searches, e-mail correspondence, as well as many telephone contacts before we were able to locate a total of 161 management plans that apply to 45 of the 64 HELCOM MPAs; 19 HELCOM MPAs lack management plans (1 in Sweden, 2 in Germany, and 16 in Finland, 11 out of which were established during 2014-2015).

In all four countries the HELCOM MPAs overlap with other types of protection including Natura 2000, and national protection measures such as national parks or nature reserves. Overall, the HELCOM MPAs include other types of protected areas with 1-35 such areas (average=3) per HELCOM MPA. Management responsibility varies among countries and rests with regional, county administrative boards (Sweden), regional authorities (Finland), federal states (Germany), and the national environmental board (Estonia).

The management plans have typically not been developed for the HELCOM MPA but for other types of protection that apply to the whole or parts of the same area (Natura 2000, national parks, or nature reserves). For 8 of the 45 HELCOM MPAs that have management plans the plans only cover part of the HELCOM MPA area (4 Estonian, 4 Swedish; Tables 3, S3).

In Sweden, each of the 20 HELCOM MPAs includes one or several other types of protection (Natura 2000, nature reserves, and/or national parks), and available management plans typically refer to those areas. Only in four cases single, overall plans for the entire HELCOM MPA have been developed (Table S3). Often the protected areas overlap in the sense that a Natura 2000 MPA also is a nature reserve or a national park. In such cases plans typically exist for both types of protection, yet referring to the same area. This management structure implies that there are a multitude of different management plans; we located a total of 132 management plans for the 20 Swedish HELCOM MPAs with between 1 and 35 plans per HELCOM MPA.

The situation is similar in Estonia, although at the most 7 protected areas are included in one HELCOM MPA. In one case, three types of protection apply to the same area: HELCOM MPA, Natura 2000, and national park regulation. All Estonian HELCOM MPAs have one or more management plans (Tables 3, S3).

In Finland there is usually a complete overlap between the various forms of protection such that HELCOM MPAs typically overlaps completely with a Natura 2000. Further, there can be additional overlap with national parks or other types of area protection in Finland. In many cases there is a complete overlap between a HELCOM MPA, a Natura 2000, and a national park such that the one and same area is protected in all three ways. Only one plan applies to a particular HELCOM MPA, however, and all the forms of protection are included in the same plan. In two cases one plan even covers several HELCOM MPAs including all other protected areas within them and in one case the plan refers to an even larger protected area which is not in itself a HELCOM MPA (Tables 3, S3).

There are no separate management plans for the German HELCOM MPAs. For the two areas where plans are available they apply to the national park located – in these two cases there is a complete overlap between HELCOM MPA, national park and Natura 2000 (Table S1).

Reference

Moussis N. 2015. Access to the European Union: law, economics, policies. 19<sup>th</sup> updated edition, Rixenstart, 2011. ISBN 978-2-9601045-0-9. Available at:  
<http://www.europedia.moussis.eu>

Table S1. Baltic Sea HELCOM MPAs in Sweden (20), Finland (33), Estonia (7) and Germany (4) included in this study (cf. Figure 3). In all four countries the HELCOM MPAs overlap with Natura 2000 and/or with other forms of protection such as national parks or nature reserves. Thus, in many cases a separate HELCOM MPA includes one or more Natura 2000, and in some cases it also includes a national park. The system for management plans varies among countries; in Finland if a management plan is available it covers the whole HELCOM MPA and all the other protected areas within it. Typically, there is complete overlap between HELCOM MPAs and Natura 2000 in Finland, and sometimes these also overlap completely with national parks. In contrast, in Sweden, Estonia, and Germany, when plans are available they apply to separate Natura 2000 or other protected areas within the MPA. In very few cases there are management plans that apply directly to the whole HELCOM MPA in these countries. No HMPAs=number of HELCOM MPAs, N2K=Natura 2000. No hits=number of times search terms (cf. Figure 2) occur in management plan(s), and the last column summarize if and how the hits refer to genetic diversity. \*=the same one management plan refers to these three HELCOM MPAs. \*\*one plan for two HELCOM MPAs

| Country (no HMPAs/ no plans) | HELCOM MPA                                     | Fig 3 no | Natura 2000s in the MPA                                                                                     | Other protected areas in the MPA with management plans                                                                                                          | Comments area overlaps                                                                                                      | Available management plans | Plan(s) cover the HMPA area | Authority in charge | No hits/no plans with hits | Content on genetic diversity |
|------------------------------|------------------------------------------------|----------|-------------------------------------------------------------------------------------------------------------|-----------------------------------------------------------------------------------------------------------------------------------------------------------------|-----------------------------------------------------------------------------------------------------------------------------|----------------------------|-----------------------------|---------------------|----------------------------|------------------------------|
| Finland (33/14)              | Hailuoto northshore                            | 22       | Hailuoto, northshore FI1100201                                                                              | -                                                                                                                                                               | Complete overlap HMPA – N2K.                                                                                                | 1* for N2K: FI1100201      | Yes                         | Metsähallitus       | 0/0                        | -*                           |
|                              | Isomatala-Maasyvänlahti                        | 25       | Isomatala–Maasyvänlahti FI1100203                                                                           | -                                                                                                                                                               | Complete overlap HMPA – N2K.                                                                                                | 1* for N2K: FI1100203      | Yes                         | Metsähallitus       | *                          | See results for Hailuoto.    |
|                              | Eastern Gulf of Finland Archipelago and waters | 53       | Eastern Gulf of Finland Archipelago and waters FI0408001, Pernajabay and Pernaja Archipelago MPAs FI0100078 | Eastern Gulf of Finland Archipelago National Park. Within this area is also another HELCOM MPA and an N2K: Pernajabay and Pernaja Archipelago MPAs (see below). | Within the area Eastern Gulf of Finland Archipelago and Waters there are several other protected areas. We think that it is | 1 for N2K: FI0408001       | Yes                         | Metsähallitus       | 0/0                        | -                            |

|  |                                |    |                                          |   |                                                                        |                    |     |                                                                             |     |                           |
|--|--------------------------------|----|------------------------------------------|---|------------------------------------------------------------------------|--------------------|-----|-----------------------------------------------------------------------------|-----|---------------------------|
|  |                                |    |                                          |   | the National Park which provides the outer borders for the whole area. |                    |     |                                                                             |     |                           |
|  | Kirkkonummi Archipelago        | 46 | Kirkkonummi Archipelago FI0100026        | - | Complete overlap HMPA – N2K.                                           | No management plan | -   | Metsähallitus                                                               | -   | -                         |
|  | Kirkkosalmi                    | 26 | KirkkosalmiFI 1100202                    | - | Complete overlap HMPA – N2K.                                           | 1* FI1100202       | Yes | Metsähallitus                                                               | *   | See results for Hailuoto. |
|  | Kokkola Archipelago            | 29 | Kokkola Archipelago FI1000033            | - | Complete overlap HMPA – N2K.                                           | 1 FI1000033        | Yes | Centre for Economic Development, Transport and the Environment (ELY Centre) | 0/0 | -                         |
|  | Kristiinankaupunki Archipelago | 33 | Kristiinankaupunki Archipelago FI0800134 | - | Complete overlap HMPA – N2K.                                           | No management plan | -   | Metsähallitus                                                               | -   | -                         |
|  | Liminka Bay                    | 23 | Liminka Bay FI1102200                    | - | Complete overlap HMPA – N2K.                                           | No management plan | -   | Metsähallitus                                                               | -   | -                         |
|  | Luoto Archipelago              | 28 | Luoto Archipelago FI0800132              | - | Complete overlap HMPA – N2K.                                           | 1 FI0800132        | Yes | ELY Centre                                                                  | 0/0 | -                         |
|  | Outer Bothnian                 | 31 | Outer Bothnian                           | - | Complete                                                               | 1 (draft)          | Yes | Metsähallitus                                                               | 0/0 | -                         |

|  |                                         |    |                                                   |                                                                                                                                                                                    |                                                                                                                                                             |                                                                                                                                                                  |     |               |     |                                                                                                                              |
|--|-----------------------------------------|----|---------------------------------------------------|------------------------------------------------------------------------------------------------------------------------------------------------------------------------------------|-------------------------------------------------------------------------------------------------------------------------------------------------------------|------------------------------------------------------------------------------------------------------------------------------------------------------------------|-----|---------------|-----|------------------------------------------------------------------------------------------------------------------------------|
|  | Threshold Archipelago - The Quark       |    | Threshold Archipelago, the Quark FI0800130        |                                                                                                                                                                                    | overlap HMPA – N2K.                                                                                                                                         | FI0800130                                                                                                                                                        |     |               |     |                                                                                                                              |
|  | Närpiö Archipelago                      | 32 | Närpiö Archipelago FI0800135                      | -                                                                                                                                                                                  | Complete overlap HMPA – N2K.                                                                                                                                | No management plan                                                                                                                                               | -   | Metsähallitus | -   | -                                                                                                                            |
|  | Oura Archipelago                        | 34 | Oura Archipelago, FI0200077                       | Oura Archipelago national park. Complete overlap between HELCOM MPA, N2K, and the national park. Further, all these three areas are part of the larger Bothnian Sea National Park. | Complete overlap HMPA – N2K – National Park.<br><br>All three are part of another national park – Bothnian Sea National Park which is not in itself a HMPA. | 1 (draft)**<br>The plan for Oura Archipelago is included in the drafted management plan for the Bothnian Sea National Park.                                      | Yes | Metsähallitus | 1/1 | Concerns mouflon sheep stating that their population size on an island should be large enough to maintain genetic diversity. |
|  | Pernajabay and Pernaja Archipelago MPAs | 50 | Pernajabay and Pernaja Archipelago MPAs FI0100078 | -                                                                                                                                                                                  | Complete overlap HMPA – N2K.                                                                                                                                | 1<br>FI0100078<br>The new plan for Pernajabay and Pernaja Archipelago is included in the management plan for the Eastern Gulf of Finland Archipelago and waters. | Yes | Metsähallitus | 0/0 | -                                                                                                                            |

|  |                                    |    |                                              |                            |                                                |                                                                                                 |     |               |     |                                                                                                                               |
|--|------------------------------------|----|----------------------------------------------|----------------------------|------------------------------------------------|-------------------------------------------------------------------------------------------------|-----|---------------|-----|-------------------------------------------------------------------------------------------------------------------------------|
|  | Bothnian Bay National Park         | 21 | Bothnian Bay National Park FI1300301         | Bothnian Bay National Park | Complete overlap HMPA – N2K.                   | 1 (draft) FI1300301                                                                             | Yes | Metsähallitus | 0/0 | -                                                                                                                             |
|  | Porvoonjoki Estuary-Stensböle      | 49 | Porvoonjoki Estuary-Stensböle FI0100074      | -                          | Complete overlap HMPA – N2K.                   | 1 FI0100074                                                                                     | Yes | ELY Centre    | 0/0 | -                                                                                                                             |
|  | Rahja Archipelago                  | 27 | Rahja Archipelago FI1000005                  | -                          | Complete overlap HMPA – N2K.                   | 1 FI1000005<br>Included in a management plan for a larger protected area called Kalajoki Coast. | Yes | Metsähallitus | 0/0 | -                                                                                                                             |
|  | Saaristomeri - Archipelago Sea     | 42 | Saaristomeri - Archipelago Sea FI0200164     | Saaristomeri National Park | Complete overlap HMPA, N2K, and national park. | 1 For the National Park.                                                                        | Yes | Metsähallitus | 3/1 | With respect to hunting important that genetic diversity is maintained. Gene banks potential aid for rare plants and animals. |
|  | Söderskär and Långören Archipelago | 47 | Söderskär and Långören Archipelago FI0100077 | -                          | Complete overlap HMPA – N2K.                   | 1 (draft) FI0100077                                                                             | Yes | Metsähallitus | 0/0 | -                                                                                                                             |
|  | Tammisaari and                     | 45 | Tammisaari                                   | Tammisaari and Hanko       | The national                                   | 1                                                                                               | Yes | Metsähallitus | 0/0 | -                                                                                                                             |



|  |                                    |    |                                                     |                                                                           |                                                                                                  |                                                                                                                  |     |               |     |                                   |
|--|------------------------------------|----|-----------------------------------------------------|---------------------------------------------------------------------------|--------------------------------------------------------------------------------------------------|------------------------------------------------------------------------------------------------------------------|-----|---------------|-----|-----------------------------------|
|  | Hanko Archipelago and Pojo Bay MPA |    | and Hanko Archipelago and Pojo Bay MPA<br>FI0100005 | Archipelago and Pojo Bay National Park                                    | park is the largest of the three areas. Other areas included.                                    | FI0100005                                                                                                        |     |               |     |                                   |
|  | Tulliniemi bird protection area    | 43 | Tulliniemi bird protection area<br>FI0100006        | -                                                                         | Complete overlap<br>HMPA – N2K.                                                                  | 1 (draft)<br>FI0100006                                                                                           | Yes | Metsähallitus | 0/0 |                                   |
|  | Uusikaarlepyy Archipelago          | 30 | Uusikaarlepyy Archipelago<br>FI0800133              | -                                                                         | Complete overlap<br>HMPA – N2K.                                                                  | No management plan                                                                                               | -   | Metsähallitus | -   | -                                 |
|  | Uusikaupunki Archipelago           | 35 | Uusikaupunki Archipelago<br>FI0200072               | Uusikaupunki Archipelago is part of the larger Bothnian Sea National Park | Complete overlap<br>HMPA – N2K. Both part of larger national park which is not in itself a HMPA. | 1(draft)**<br>FI0200072<br>This plan is included in the draft management plan for the Bothnian Sea National park | -   | Metsähallitus | **  | See results for Oura Archipelago. |
|  | Länsiletto                         | 52 | Länsiletto<br>FI0400001                             | -                                                                         | Complete overlap<br>HMPA – N2K.                                                                  | No management plan                                                                                               | -   | -             | -   | -                                 |
|  | Luodematalat                       | 51 | Luodematalat<br>FI0400002                           | -                                                                         | Complete overlap<br>HMPA – N2K.                                                                  | No management plan                                                                                               | -   | -             | -   | -                                 |
|  | Merikalla                          | 24 | Merikalla<br>FI1100207                              | -                                                                         | Complete overlap<br>HMPA – N2K.                                                                  | No management plan                                                                                               | -   | -             | -   | -                                 |

|                  |                                          |    |                                                       |   |                                       |                          |   |                                                |   |   |
|------------------|------------------------------------------|----|-------------------------------------------------------|---|---------------------------------------|--------------------------|---|------------------------------------------------|---|---|
|                  | Björkör Islands                          | 39 | Björkör Islands<br>FI1400006                          | - | Complete<br>overlap<br>HMPA –<br>N2K. | No<br>management<br>plan | - | -                                              | - | - |
|                  | Boxö Islands                             | 36 | Boxö Islands<br>FI1400021                             | - | Complete<br>overlap<br>HMPA –<br>N2K. | No<br>management<br>plan | - | -                                              | - | - |
|                  | Långör-Östra<br>Sundskär<br>Islands      | 38 | Långör-Östra<br>Sundskär<br>Islands<br>FI1400042      | - | Complete<br>overlap<br>HMPA –<br>N2K. | No<br>management<br>plan | - | -                                              | - | - |
|                  | Signilskär-<br>Märket Islands            | 37 | Signilskär-<br>Märket Islands<br>FI1400047            | - | Complete<br>overlap<br>HMPA –<br>N2K. | No<br>management<br>plan | - | -                                              | - | - |
|                  | Sea area south<br>from Sandkallan        | 48 | Sea area south<br>from<br>Sandkallan<br>FI0100106     | - | Complete<br>overlap<br>HMPA –<br>N2K. | No<br>management<br>plan | - | -                                              | - | - |
|                  | Open sea area<br>southeast from<br>Hanko | 44 | Open sea area<br>southeast from<br>Hanko<br>FI0100107 | - | Complete<br>overlap<br>HMPA –<br>N2K. | No<br>management<br>plan | - | -                                              | - | - |
|                  | Lågsjär Islands                          | 40 | Lågsjär Islands<br>FI1400058                          | - | Complete<br>overlap<br>HMPA –<br>N2K. | No<br>management<br>plan | - | -                                              | - | - |
|                  | Bogskär Islands                          | 41 | -                                                     | . | Only HMPA.                            | No<br>management<br>plan | - | -                                              | - | - |
| Germany<br>(4/2) | Kadetrinne                               | 64 | Kadetrinne<br>DE1339301                               | - | Complete<br>overlap<br>HMPA –<br>N2K. | No<br>management<br>plan | - | Bundesamt<br>für<br>Naturschutz,<br>Insel Vilm | - | - |

|  |                                              |    |                                                                                                                                                                       |                                                                                                |                                                                               |                                                       |     |                                                |     |                                                                                                                                                                                                   |
|--|----------------------------------------------|----|-----------------------------------------------------------------------------------------------------------------------------------------------------------------------|------------------------------------------------------------------------------------------------|-------------------------------------------------------------------------------|-------------------------------------------------------|-----|------------------------------------------------|-----|---------------------------------------------------------------------------------------------------------------------------------------------------------------------------------------------------|
|  | Pommersche Bucht-Rönnebank                   | 61 | Westliche Rönnebank<br>DE1249301,<br>Adlergrund<br>DE1251301,<br>SPA<br>Pommersche Bucht<br>DE1552401,<br>Pommersche Bucht mit Oderbank<br>DE1652301                  | -                                                                                              |                                                                               | No management plan                                    | -   | Bundesamt für Naturschutz, Insel Vilm          | -   | -                                                                                                                                                                                                 |
|  | Jasmund National Park                        | 62 | Jasmund<br>DE1447302                                                                                                                                                  | Jasmund National Park. Complete overlap between the HMPA, the N2K and the national park.       | Complete overlap between the HMPA, the N2K and the national park.             | 1<br>For the national park.                           | Yes | Landesamt für umwelt, naturschutz und geologie | 2/1 | Aim of area includes preserving genetic resources of species.                                                                                                                                     |
|  | Vorpommersche Boddenlandschaft National Park | 63 | Recknitz-Ästuar und Halbinsel Zingst<br>DE1542302,<br>Darßer Schwelle<br>DE1540302,<br>Darß<br>DE1541301,<br>Vorpommersche Boddenlandschaft und nördlicher Strelasund | Vorpommersche Boddenlandschaft National Park. Complete overlap between HMPA and national park. | Complete overlap between HMPA and national park. 5 N2K included in this area. | 1<br>One plan with three parts for the national park. | Yes | Landesamt für umwelt, naturschutz und geologie | 3/1 | Aim of area includes preserving genetic resources of species (2 hits). Baltic marine fish differ from North Sea populations. Two types of herring within the Baltic - spring and autumn spawning. |

|                   |             |    |                                                                                                                                                                  |                        |                                                                 |                                                                                  |     |                                      |     |   |
|-------------------|-------------|----|------------------------------------------------------------------------------------------------------------------------------------------------------------------|------------------------|-----------------------------------------------------------------|----------------------------------------------------------------------------------|-----|--------------------------------------|-----|---|
|                   |             |    | DE1542401,<br>Plantagenetgru<br>nd DE1343301                                                                                                                     |                        |                                                                 |                                                                                  |     |                                      |     |   |
| Estonia<br>(7/13) | Hiiu Madala | 56 | Paope<br>EE0040112,<br>Hiiu Madala<br>EE0040129,<br>Kõrgessaare-<br>Mudaste<br>EE0040130                                                                         | -?                     |                                                                 | 1<br>EE0040112                                                                   | No  | Estonian<br>Environmen-<br>tal Board | 0/0 | - |
|                   | Kura Kurk   | 60 | Kaugatoma-<br>Lõu<br>EE0040441,<br>Abruka<br>EE0040401,<br>Allirahu<br>EE0040402,<br>Kura Kurgu<br>EE0040434,<br>Vesitükimaa<br>EE0040490,<br>Kerju<br>EE0040421 | Rahuste Nature Reserve |                                                                 | 4<br>EE0040441,<br>EE0040401,<br>EE0040402,<br>&<br>Rahuste<br>Nature<br>Reserve | No  | Estonian<br>Environmen-<br>tal Board | 0/0 | - |
|                   | Lahemaa     | 54 | Lahemaa<br>EE0010173                                                                                                                                             | Lahemaa National Park  | Complete<br>overlap<br>between three<br>types of<br>protection. | 1<br>EE0010173                                                                   | Yes | Estonian<br>Environmen-<br>tal Board | 0/0 | - |
|                   | Pakri       | 55 | Pakri<br>EE0010129                                                                                                                                               |                        |                                                                 | 1<br>EE0010129                                                                   | Yes | Estonian<br>Environmen-<br>tal Board | 0/0 | - |
|                   | Pärnu lahe  | 58 | Manilaiu-<br>Hanilaiu                                                                                                                                            |                        |                                                                 | 1<br>EE0040328                                                                   | No  | Estonian<br>Environmen-              | 0/0 | - |

|                    |                                                       |    |                                                                                           |                                                |                                         |                                                                          |     |                                                  |     |                                                                                                                                                                                                                         |
|--------------------|-------------------------------------------------------|----|-------------------------------------------------------------------------------------------|------------------------------------------------|-----------------------------------------|--------------------------------------------------------------------------|-----|--------------------------------------------------|-----|-------------------------------------------------------------------------------------------------------------------------------------------------------------------------------------------------------------------------|
|                    |                                                       |    | EE0040328,<br>Pärnu lahe<br>EE0040346,<br>Luitemaa<br>EE0040351,<br>Tõstamaa<br>EE0040363 |                                                |                                         |                                                                          |     | tal Board                                        |     |                                                                                                                                                                                                                         |
|                    | Väinameri                                             | 57 | Väikese väina<br>EE0040486,<br>Väinamere<br>EE0040001                                     | Hiiumaa Nature Reserve,<br>Üügu Nature Reserve |                                         | 3<br>EE0040486,<br>Hiiuma Nature<br>Reserve, &<br>Üügu Nature<br>Reserve | No  | Estonian<br>Environmen-<br>tal Board             | 1/1 | Assisted gene flow<br>via pasturing cattle<br>needed for<br>disconnected marsh<br>angelica ( <i>Angelica<br/>palustris</i> )<br>populations along<br>seashores to avoid<br>genetical<br>impoverishment of<br>the plant. |
|                    | Vilsandi                                              | 59 | Tagamõisa<br>EE0040476,<br>Vilsandi<br>EE0040496                                          |                                                |                                         | 2<br>EE0040476,<br>EE0040496                                             | Yes | Estonian<br>Environmen-<br>tal Board             | 1/1 | Inbreeding a factor<br>potentially<br>affecting <i>Epidalea<br/>calamita</i> viability.                                                                                                                                 |
| Sweden<br>(20/129) | Hoburgs bank                                          | 5  | Hoburgs bank<br>SE0340144                                                                 |                                                | Complete<br>overlap<br>HMPA and<br>N2K. | 1<br>SE0340144                                                           | Yes | Gotland<br>County<br>Administra-<br>tive Board   | 0/0 | -                                                                                                                                                                                                                       |
|                    | Kopparstenarna/<br>Gotska<br>Sandön/Salvore<br>v Area | 7  | Gotska sandön<br>SE0340097                                                                | Gotska sandön National<br>Park                 |                                         | 2<br>SE0340097 &<br>Gotska sandön<br>National Park                       | Yes | Gotland<br>County<br>Administra-<br>tive Board   | 1/1 | Areas with no<br>fishing allowed<br>protect genetically<br>valuable<br>individuals of fish.                                                                                                                             |
|                    | Axmar                                                 | 13 | Axmar-<br>Gåsholma<br>SE0630166                                                           | Axmar Nature Reserve                           |                                         | 2<br>SE0630166 &<br>Nature<br>Reserve                                    | No  | Gävleborg<br>County<br>Administra-<br>tive Board | 0/0 | -                                                                                                                                                                                                                       |

|  |                          |    |                                                                                                                                                                                                     |                                                                   |                                                  |                                                                                                                                                                                                                        |     |                                                  |       |                                                                                                                                                                                                                                                                           |
|--|--------------------------|----|-----------------------------------------------------------------------------------------------------------------------------------------------------------------------------------------------------|-------------------------------------------------------------------|--------------------------------------------------|------------------------------------------------------------------------------------------------------------------------------------------------------------------------------------------------------------------------|-----|--------------------------------------------------|-------|---------------------------------------------------------------------------------------------------------------------------------------------------------------------------------------------------------------------------------------------------------------------------|
|  | Finngundet-östra banken  | 14 | Finngundet-östra banken<br>SE0630260                                                                                                                                                                |                                                                   | Complete overlap<br>HMPA and<br>N2K.             | 1<br>SE0630260                                                                                                                                                                                                         | Yes | Gävleborg<br>County<br>Administra-<br>tive Board | 0/0   | -                                                                                                                                                                                                                                                                         |
|  | Northern<br>Midsjöbanken | 4  | Northern<br>Midsjöbanken<br>SE0330273                                                                                                                                                               |                                                                   | Complete<br>overlap<br>between<br>HMPA &<br>N2K. | No<br>management<br>plan                                                                                                                                                                                               |     | Kalmar<br>County<br>Administra-<br>tive Board    | -     |                                                                                                                                                                                                                                                                           |
|  | Värnanäs<br>Archipelago  | 3  | Värnanäs<br>Archipelago<br>SE0330123                                                                                                                                                                | Värnanäs Archipelago<br>Nature Reserve                            |                                                  | 2<br>SE0330123 &<br>Nature<br>Reserve                                                                                                                                                                                  | Yes | Kalmar<br>County<br>Administra-<br>tive Board    | 1/1   | Baltic harbor seal<br>( <i>Phoca vitulina</i> )<br>population<br>genetically<br>vulnerable due to<br>small population<br>size. Genetically<br>separate from<br>Swedish west coast<br>populations.                                                                         |
|  | Haparanda<br>Archipelago | 20 | Austi<br>SE0820741,<br>Haparanda<br>skärgård<br>SE0820108,<br>Enskär<br>SE0820742,<br>Haparanda<br>Sandskär<br>SE0820320,<br>Huitori<br>SE0820743,<br>Kataja<br>SE0820744,<br>Malören<br>SE0820724, | Haparanda Archipelago<br>National Park,<br>Malören Nature Reserve |                                                  | 15<br>SE0820741,<br>SE0820108,<br>SE0820742,<br>SE0820320,<br>SE0820743,<br>SE0820744,<br>SE0820724,<br>SE0820734,<br>SE0820746,<br>SE0820735,<br>SE0820747,<br>SE0820748,<br>SE0820750,<br>the National<br>Park & the | No  | Norrbottn<br>County<br>Administra-<br>tive Board | 14/13 | Risk of negative<br>genetic effects due<br>to isolated<br>populations of<br>Siberian primrose<br>( <i>Primula nutans</i> ;<br>13 plans) and<br>bluntleaf sandwort<br>( <i>Moehringia<br/>lateriflora</i> ; 1 plan).<br>The exact same text<br>is repeated in 13<br>plans. |

|  |            |    |                                                                                                                                                                            |  |                                         |                   |     |                                                   |     |   |
|--|------------|----|----------------------------------------------------------------------------------------------------------------------------------------------------------------------------|--|-----------------------------------------|-------------------|-----|---------------------------------------------------|-----|---|
|  |            |    | Sarvenkataja<br>SE0820734,<br>Stora<br>Hamnskär<br>SE0820746,<br>Stora Hepokari<br>SE0820735,<br>Tantamanni<br>SE0820747,<br>Tervaletto<br>SE0820748,<br>Äimä<br>SE0820750 |  |                                         | Nature<br>Reserve |     |                                                   |     |   |
|  | Marakallen | 19 | Marakallen<br>SE0820751                                                                                                                                                    |  | Complete<br>overlap<br>HMPA and<br>N2K. | 1<br>SE0820751    | Yes | Norrbotten<br>County<br>Administra-<br>tive Board | 0/0 | - |

|  |                                             |    |                                                                                                                                             |                                                                                                                                                          |                                                                                                    |                                                                                   |     |                                      |     |                                                                                                                                                                                                                            |
|--|---------------------------------------------|----|---------------------------------------------------------------------------------------------------------------------------------------------|----------------------------------------------------------------------------------------------------------------------------------------------------------|----------------------------------------------------------------------------------------------------|-----------------------------------------------------------------------------------|-----|--------------------------------------|-----|----------------------------------------------------------------------------------------------------------------------------------------------------------------------------------------------------------------------------|
|  | Falsterbo Peninsula with Måkläppen          | 1  | Falsterbo skjutfält SE0430111, Falsterbo-Foteviken SE0430002, Falsterbohalvön SE0430095, Tygelsjö-Gessie SE043149, Vellinge ängar SE0430150 | Flommen, Norra Ljungshusen, Skanör-Höll, Foteviksområdet, Skanörs Ljung, Kämpinge strandbad, and Ljungskogens och Ljungshusens strandbad Nature Reserves |                                                                                                    | 12<br>One for each of the 5 N2K and one for each of the 7 nature reserves         | No  | Skåne County Administrative Board    | 4/1 | Risk of negative genetic effects due to small population size for harbor seal <i>Phoca vitulina</i> , and due to small and isolated populations of little grape fern ( <i>Botrychium simplex</i> ; in plan for SE0430002). |
|  | Torshamnns Archipelago (Blekinge arkipelag) | 2  | Hästholmen-Öppenskar SE0410099, Sandhamn SE0410225, Torshamn-Hästholmen SE0410041, Torshamnns udde SE0410104, Utlängan SE0410224            | Torshamnns Archipelago Helcom MPA, Hästholmen-Ytterön, Torshamnns udde, Utklippan Nature Reserves                                                        | This HMPA has a particular plan for the whole area. There is overlap with nature reserves and N2K. | 9<br>One for each N2K (5), one for each nature reserve (3), and one for the HMPA. | Yes | Blekinge County Administrative Board | 0/0 | -                                                                                                                                                                                                                          |
|  | Bullerö-Bytta                               | 10 | Bullerö-Bytta SE0110088                                                                                                                     | Biskopsö, Bullerö, Långskär, and Långviksskär Nature                                                                                                     | The five protected areas together                                                                  | 5<br>One for the N2K, one for                                                     | Yes | Stockholm County Administra-         | 0/0 | -                                                                                                                                                                                                                          |



|  |                             |    |                                                  | Reserves                                        | cover the whole HMPA.                               | each nature reserve.                                                         |     | tive Board                            |     |                                                                                                                                                                                                                                                                                                                                                                                                                                                                                                                                                |
|--|-----------------------------|----|--------------------------------------------------|-------------------------------------------------|-----------------------------------------------------|------------------------------------------------------------------------------|-----|---------------------------------------|-----|------------------------------------------------------------------------------------------------------------------------------------------------------------------------------------------------------------------------------------------------------------------------------------------------------------------------------------------------------------------------------------------------------------------------------------------------------------------------------------------------------------------------------------------------|
|  | Stora Nassa-Svenska Högarna | 11 | Stora Nassa SE0110092, Svenska Högarna SE0110096 | Stora Nassa and Svenska Högarna Nature Reserves | This HMPA has a particular plan for the whole area. | 5<br>One for each N2K, 2 for the nature reserves and one for the whole HMPA. | Yes | Stockholm County Administrative Board | 8/3 | Genetic exchange among populations needed for long term favourable status. Unclear if this goal is reached in this area. Risk of negative genetic effects due to small, isolated/poorly connected subpopulations of little grapefern ( <i>Botrychium simplex</i> ) and northern crested newt ( <i>Triturus cristatus</i> ; Stora Nassa SE0110092 and Svenska Högarna SE0110096). Restoring pike ( <i>Esox lucius</i> ) populations through releases should be documented and monitored to avoid negative genetic effects and inbreeding (Stora |

|  |                         |    |                                                                                                                                                                                 |                                                                                                                      |                                                                                                   |                                                                                                        |     |                                                         |      |                                                                                                                                                                                                                                                                                                                   |
|--|-------------------------|----|---------------------------------------------------------------------------------------------------------------------------------------------------------------------------------|----------------------------------------------------------------------------------------------------------------------|---------------------------------------------------------------------------------------------------|--------------------------------------------------------------------------------------------------------|-----|---------------------------------------------------------|------|-------------------------------------------------------------------------------------------------------------------------------------------------------------------------------------------------------------------------------------------------------------------------------------------------------------------|
|  |                         |    |                                                                                                                                                                                 |                                                                                                                      |                                                                                                   |                                                                                                        |     |                                                         |      | Nassa nature reserve).                                                                                                                                                                                                                                                                                            |
|  | Fifång (Askö-Hartsö)    | 9  | Fifång SE0110101, Skärtårdsreservaten Ringsö, Sävö, Lacka, Långö, Hartsö SE0220129, Bokö-Oxnö SE0220215, Stendörren SE0220218, Persö SE0220234, Askö SE0220439, Krämö SE0220509 | Fifång, Stora Bergö, Bokö-Askö, Bokö-Oxnö, Krämö, Lacka, Långö, Persö, Askö, Stendörren, Sävö, Hartsö Nature Reserve | Several of the Nature Reserves overlaps completely with N2K. There are 5 plans for N2K SE0220129. | 23<br>5 plans for the N2K SE0220129, one for each of the others (6). One for each nature reserve (12). | Yes | Stockholm and Södermanland County Administrative Boards | 3/3  | Fragmentation results in lack of gene flow between populations. An endemic subspecies of <i>Cakile maritima ssp. baltica</i> in Askö (SE0220439, SE0220129, Askö Nature Reserve).                                                                                                                                 |
|  | Gräsö-Singö Archipelago | 12 | Grillskäret SE0210248, Hället, Blåbådan SE0210041, Högbådan SE0210249, Örskär SE0210228, Västerbådan, Lågagrundet SE0210040                                                     | Gräsö östra skärgård and Örskär Nature Reserves                                                                      | Overlap between one nature reserve and a N2K (Örskär).                                            | 7<br>One for each N2K and each nature reserve.                                                         | No  | Uppland County Administrative Board                     | 10/3 | Pool frog ( <i>Rana lessonae</i> ) which represents the genetically distinct Swedish population (Örskär) important to conserve (Örskär nature reserve and N2K). Genetically distinct populations often occur at distribution edges. A special section on genetic diversity and resiliens with several examples in |

|  |                   |    |                                                                                                                                                                                                                                                                                  |                                                                                                                                                                                                                                                                                                                                                                     |                                                         |                                                                                                                      |     |                                            |      |                                                                                                                                                                                                                                 |
|--|-------------------|----|----------------------------------------------------------------------------------------------------------------------------------------------------------------------------------------------------------------------------------------------------------------------------------|---------------------------------------------------------------------------------------------------------------------------------------------------------------------------------------------------------------------------------------------------------------------------------------------------------------------------------------------------------------------|---------------------------------------------------------|----------------------------------------------------------------------------------------------------------------------|-----|--------------------------------------------|------|---------------------------------------------------------------------------------------------------------------------------------------------------------------------------------------------------------------------------------|
|  |                   |    |                                                                                                                                                                                                                                                                                  |                                                                                                                                                                                                                                                                                                                                                                     |                                                         |                                                                                                                      |     |                                            |      | plan for Gräsö östra skärgård nature reserve.                                                                                                                                                                                   |
|  | Kronören          | 17 | Kronören<br>SE0810001                                                                                                                                                                                                                                                            | Kronören Nature Reserve                                                                                                                                                                                                                                                                                                                                             | Complete overlap between HMPA, N2K, and nature reserve. | 2<br>One each for N2K and nature reserve.                                                                            | Yes | Västerbotten County Administrative Board   | 1/1  | Risk of negative genetic effects due to isolation in the endangered <i>Hippuris tetraphylla</i> .                                                                                                                               |
|  | The Holmö Islands | 18 | Holmöarna<br>SE0810010                                                                                                                                                                                                                                                           | Holmöarna Nature Reserve                                                                                                                                                                                                                                                                                                                                            | Complete overlap between HMPA, N2K, and nature reserve. | 2<br>One each for N2K and nature reserve.                                                                            | Yes | Västerbotten County Administrative Board   | 0/0  |                                                                                                                                                                                                                                 |
|  | High Coast        | 16 | Balesudden<br>SE0710057,<br>Djupviksberget<br>SE0710181,<br>Gnäggen<br>SE0710143,<br>Halsviksravin<br>n SE0710046,<br>Högbonden<br>SE0710042,<br>Hummelvik<br>SE0710190,<br>Lidängen<br>SE0710216,<br>Omneberget<br>SE0710048,<br>Ravin på<br>Ronön<br>SE0710204,<br>Skuleskogen | Balesudden, Bråtan,<br>Gnäggen, Herrestaberget,<br>Hummelvik, Högbonden,<br>Högklinten, Mjältön,<br>Norrfällsviken,<br>Omneberget, Rotsidan,<br>Skuleberget, Trysunda,<br>Halsviksravinen,<br>Stormyran på Ulvön,<br>Storsand, Storön, Södra<br>Ulvön, Villmyran,<br>Ögeltjärn Nature<br>Reserves<br><br>Skuleskogens National<br>Park<br><br>High coast Helcom MPA | This HMPA has a plan for the whole area.                | 35<br>One for each N2K (13), one for each nature reserve (20), one for the national park and one for the whole HMPA. | Yes | Västernorrland County Administrative Board | 14/2 | Release of alien species, populations, or genes can cause genetic contamination and result in loss of genetic variation, genetic homogenization. Subspecies of conservation concern listed (Helcom MPA, Skuleskogen SE0710054). |

|  |                                |    |                                                                                                        |                                                            |                                                    |                                                                                          |     |                                                         |     |                                                                                                                                                                                                                              |
|--|--------------------------------|----|--------------------------------------------------------------------------------------------------------|------------------------------------------------------------|----------------------------------------------------|------------------------------------------------------------------------------------------|-----|---------------------------------------------------------|-----|------------------------------------------------------------------------------------------------------------------------------------------------------------------------------------------------------------------------------|
|  |                                |    | SE0710054,<br>Stormyran på<br>Ulvön<br>SE0710182,<br>Trysunda<br>SE0710056,<br>Villmyran<br>SE0710142, |                                                            |                                                    |                                                                                          |     |                                                         |     |                                                                                                                                                                                                                              |
|  | Vänta litets<br>grund          | 15 | Vänta litets<br>grund<br>SE0710225                                                                     |                                                            | Complete<br>overlap<br>between<br>HMPA and<br>N2K. | 1<br>for N2K.                                                                            | Yes | Västernorr-<br>land County<br>Administra-<br>tive Board | 0/0 |                                                                                                                                                                                                                              |
|  | Kvädöfjärden<br>med Torrö      | 6  | Ålsvikelandet-<br>Kvädö SE<br>0230138                                                                  | Kvädöfjärden and Torrö<br>Nature Reserves                  |                                                    | 3<br>For N2K (1),<br>and for the<br>nature<br>reserves (2).                              | Yes | Östergötland<br>County<br>Administra-<br>tive Board     | 1/1 | Protected areas<br>important as gene<br>banks to protect<br>genetically distinct<br>fish populations.<br>For fishes protected<br>areas conserve<br>individuals that<br>carries genes for<br>rapid growth.                    |
|  | S:t Anna-Missjö<br>Archipelago | 8  | Sankt Anna<br>och Gryts<br>skärgårdar<br>SE0230055,<br>Missjö<br>SE0230328                             | Missjö Nature Reserve<br><br>S:t Anna-Missjö Helcom<br>MPA | This HMPA<br>has a plan for<br>the whole<br>area.  | 4<br>One for the<br>Helcom MPA,<br>one each for<br>the N2K and<br>the nature<br>reserve. | Yes | Östergötland<br>County<br>Administra-<br>tive Board     | 4/2 | Fragmentation of<br>habitats results in<br>lack of gene flow<br>between<br>populations<br>(SE0230055). Eco-<br>system approach to<br>be applied aimed at<br>securing all<br>components of<br>ecosystems<br>including genetic |

|  |  |  |  |  |  |  |  |  |  |                                                                                                                                                                          |
|--|--|--|--|--|--|--|--|--|--|--------------------------------------------------------------------------------------------------------------------------------------------------------------------------|
|  |  |  |  |  |  |  |  |  |  | variation. Probably genetic adaptation developed by Baltic Sea species. The population concept defined as a genetically separate group of individuals (HELCOM MPA plan). |
|--|--|--|--|--|--|--|--|--|--|--------------------------------------------------------------------------------------------------------------------------------------------------------------------------|
